# Supplementary material for: A cubic Sm@CdS Q-dot glass as a photocatalyst for solar H2 generation
Source: Royal Society of Chemistry journal article supplement (doi:10.1039/d4nj00050a), 2024-01-01
Supplement: d4nj00050a1.pdf [file d4nj00050a1.pdf]

Supporting Information

Figure SI-I

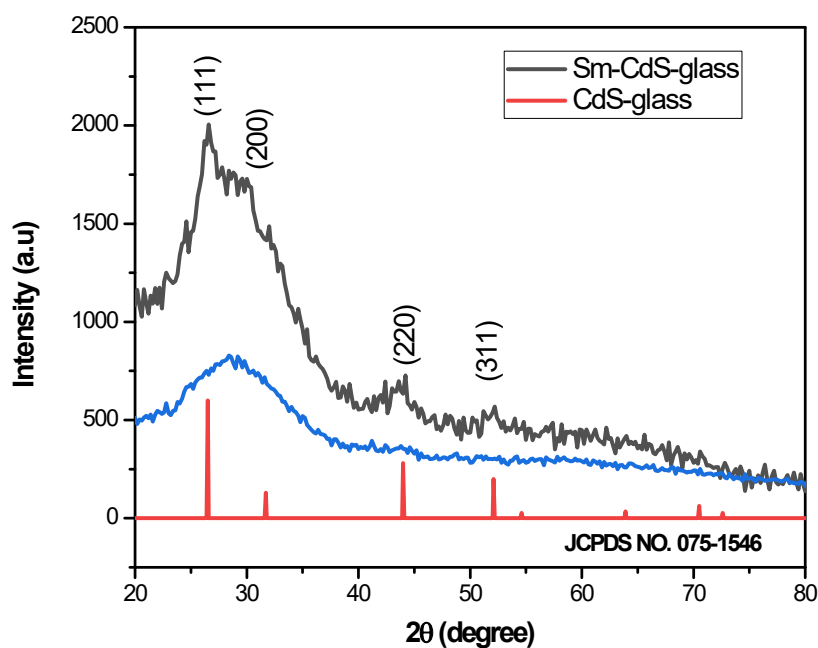

Figure SI-I; XRD pattern of CdS and Sm doped CdS in glass matrix.

Figure SI-II

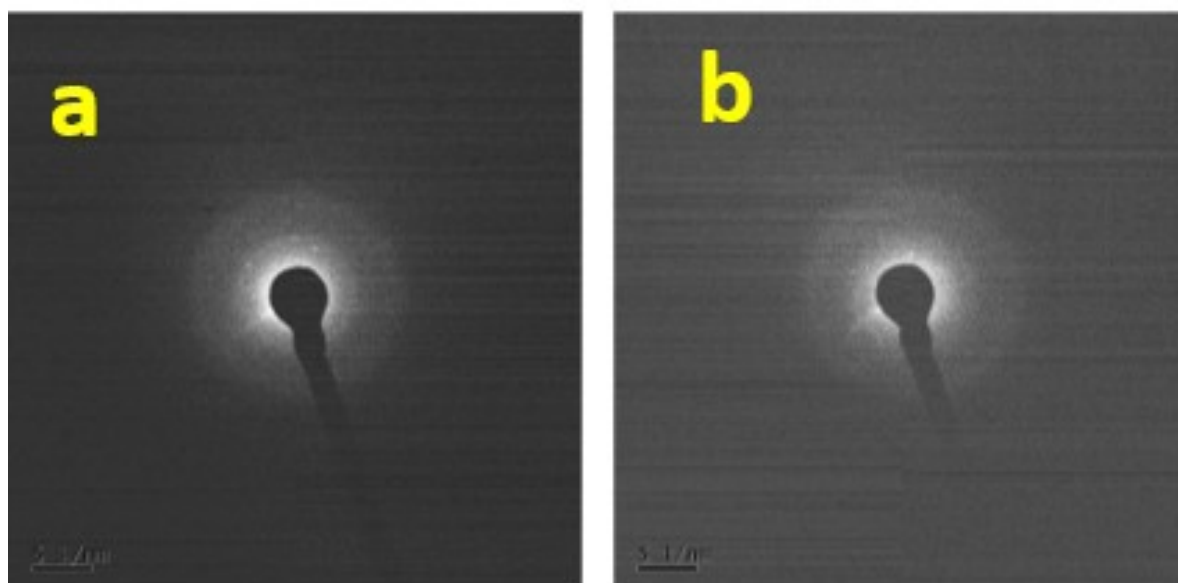

Figure SI-II: SAED pattern of these CdS and 1 % Sm doped CdS in the glass matrix.

**Figure SI-III**

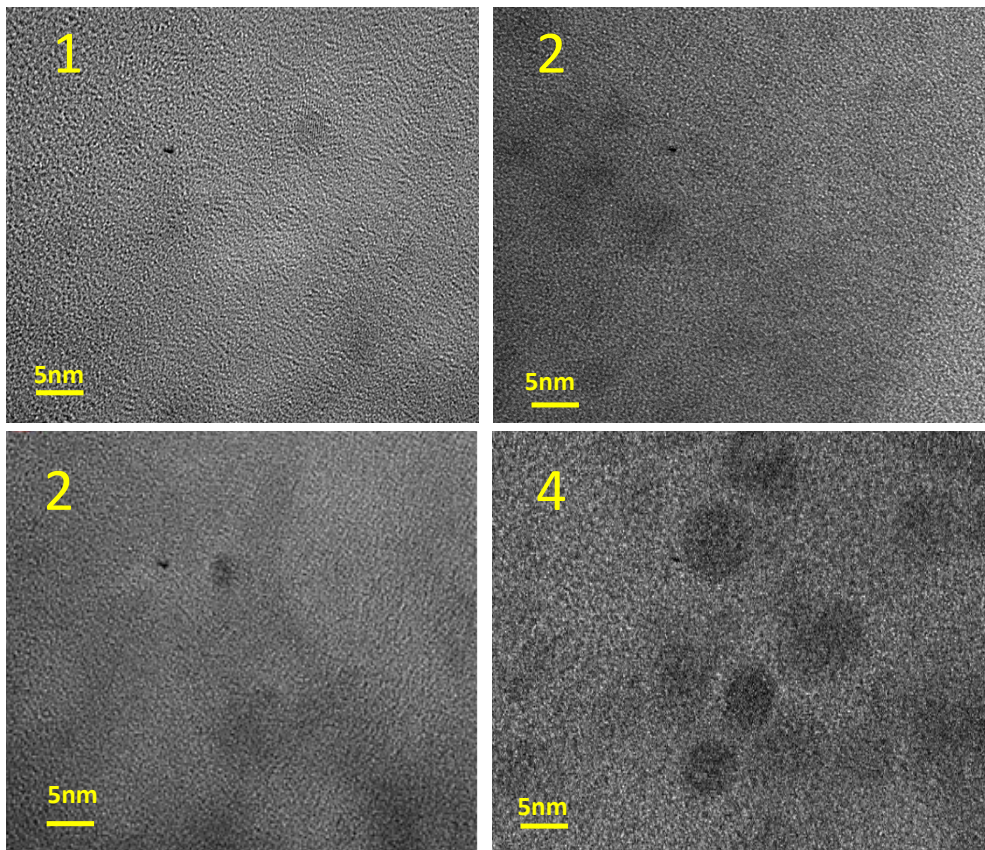

**Figure SI-III:** TEM images of 2%Sm CdS and 3 %Sm CdS doped glass at (1 & 2) 525 °C and (3&4) 575 °C

**Figure SI-IV**

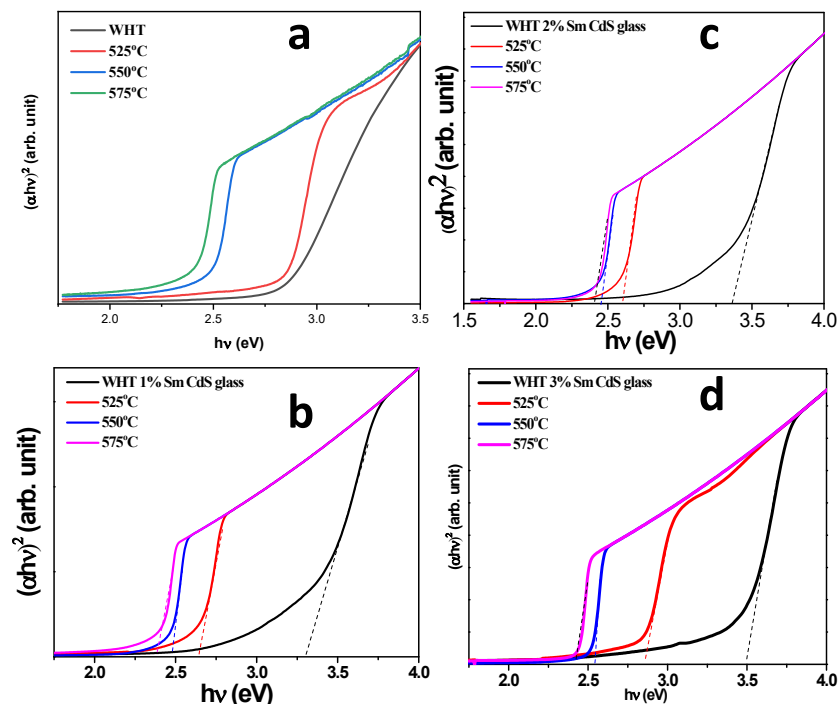

**Figure SI-IV:** Tauc Plot spectra for CdS (a), 1% Sm doped CdS (b), 2% Sm doped CdS (c) and 3% Sm doped CdS (d) in glass.

**Figure SI-V**

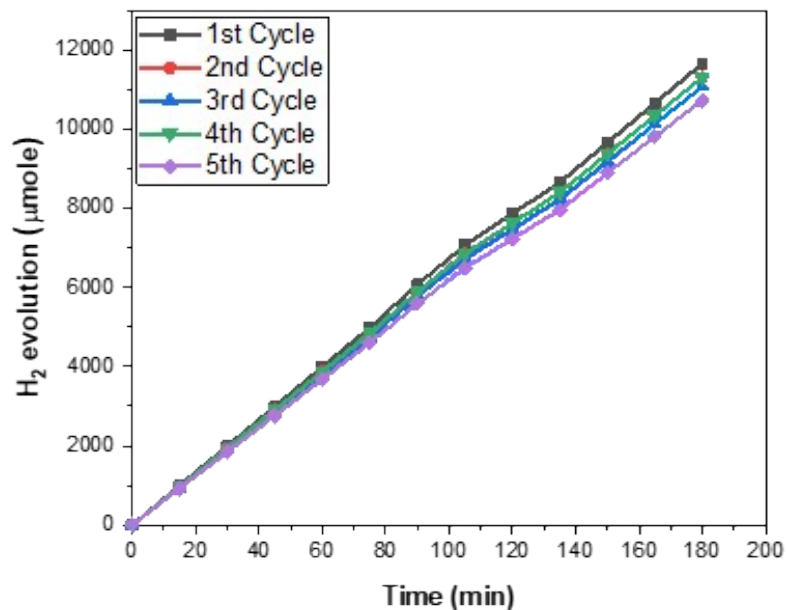

**Figure SI-V:** Stability study of the sample 1% Sm doped CdS in glass treated at 525°C.

**Table SI-I**

**Table SI-I** Comparisons of hydrogen evaluation rate with previously reported literature.

| Sr. No. | composite                          | H <sub>2</sub> in µmol/g/h | References                                                                                                                |
|---------|------------------------------------|----------------------------|---------------------------------------------------------------------------------------------------------------------------|
| 1.      | CdS/WS <sub>2</sub> /graphene      | 1840                       | Xiang Q, Cheng F, Lang D., Chem Sus Chem, 2016, 9: 996–1002.                                                              |
| 2.      | Mn <sub>13</sub> -cluster/CdS      | 3600                       | Wen T, Zhang L, Schmitt W., Dalton Trans, 2018, 47: 10857–10860.                                                          |
| 3.      | CdS/Ti <sub>3</sub> C <sub>2</sub> | 2407                       | Xiao R, Zhao C, Zou Z, et al. Appl Catal B-Environ, 2020, 268: 118382.                                                    |
| 4.      | Ag <sub>2</sub> S/CdS              | 777.3                      | RSC Adv. 2021, 16; 11(45): 28211–28222.                                                                                   |
| 5.      | Tb <sup>3+</sup> -doped CdS-550    | 3867                       | M. Al-Murish, V. Autade, E.Kumi-Barimah, R. Panmand, B. Kale, and A. Jha, ACS Appl. Energy Mater. 2023, 6, 17, 8875–8888. |
| 6.      | 1%Sm CdS-550                       | 3769.2                     | Present work.                                                                                                             |

**Figure SI-VI**

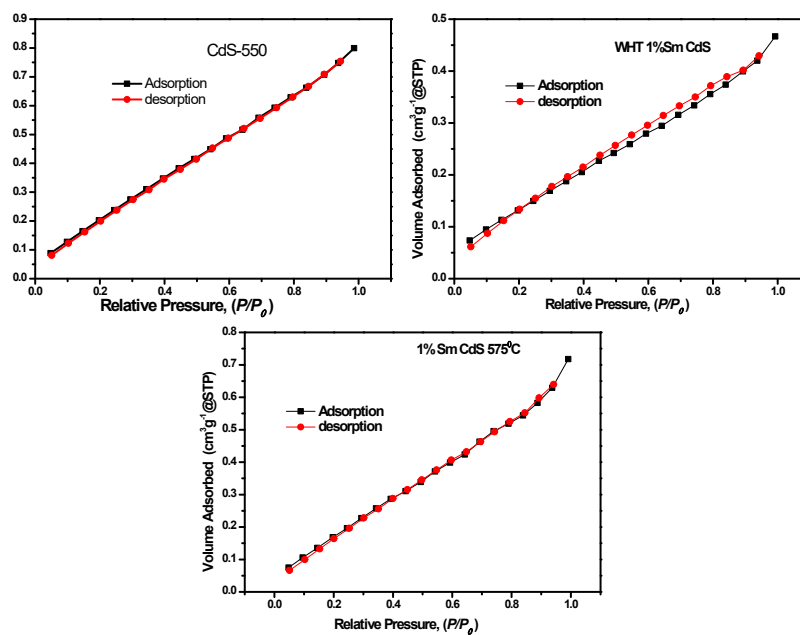

**Figure SI-VI: BET Surface area of glass.**

**Table SI-II** BET Surface are of glass samples

| Sr. No. | Sample Code     | BET Surface area (m <sup>2</sup> /g <sup>-1</sup> ) |
|---------|-----------------|-----------------------------------------------------|
| 1)      | CdS             | 16.20                                               |
| 2)      | 1% Sm CdS       | 9.69                                                |
| 3)      | 1% Sm CdS-575°C | 13.16                                               |

**Figure SI-VII**

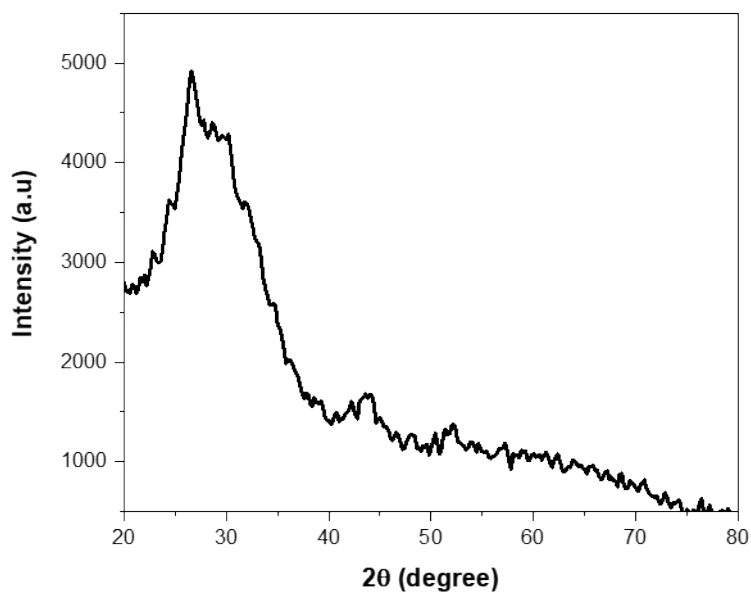

Figure SI-VI; XRD pattern of 1% Sm doped CdS in glass matrix 525°C after photocatalytic activity.
